# Supplementary material for: The powdery mildew-resistant Arabidopsis mlo2 mlo6 mlo12 triple mutant displays altered infection phenotypes with diverse types of phytopathogens
Source: PubMed Central journal article supplement (PMC5570895; doi:10.1038/s41598-017-07188-7), 2017-08-24

## **Title**

The powdery mildew-resistant *Arabidopsis mlo2 mlo6 mlo12* triple mutant displays altered infection phenotypes with diverse types of phytopathogens

## **Authors**

Johanna Acevedo-Garcia<sup>1</sup>, Katrin Gruner<sup>1</sup>, Anja Reinstädler<sup>1</sup>, Ariane Kemen<sup>2</sup>, Eric Kemen<sup>2</sup>, Lingxue Cao<sup>3</sup>, Frank L. W. Takken<sup>3</sup>, Marco U. Reitz<sup>4</sup>, Patrick Schäfer<sup>4</sup>, Richard J. O'Connell<sup>5</sup>, Stefan Kusch<sup>1</sup>, Hannah Kuhn<sup>1</sup> and Ralph Panstruga<sup>1</sup>

## Supplemental Figures

**Figure S1. Data of a second infection experiment with *C. higginsianum*.** Host cell entry rates of Col-0, *mlo2-5 mlo6-2 mlo12-1* and *mlo2-6 mlo6-4 mlo12-8* at 3 dpi with *C. higginsianum* (isolate IMI349063A). Plants were spray-inoculated with spore suspension ( $5 \times 10^5$  spores ml<sup>-1</sup>). Data show the mean  $\pm$  SD from counts of at least 140 appressoria from each leaf (one leaf each from of 3 different plants), i.e. at least 420 appressoria per plant genotype. Letters indicate statistically different groups (at least  $P < 0.05$ ) according to a GLM test (Poisson distribution).

**Figure S2. Data of two additional infection experiments with *F. oxysporum*.** Infection phenotypes were scored at 5, 7 and 10 dpi by assigning a disease index on a 0 (no symptoms) to 5 (severe disease symptoms) scale. Data shown are from a representative experiment and based on 15-20 seedlings per genotype. Each symbol in the categorical scatter plot (circle, square or triangle) represents the infection phenotype of one seedling. The crosses indicate the mean values  $\pm$  SEM. \* and \*\* indicate statistically significant differences from Col-0 ( $P < 0.05$  and  $P < 0.01$ , respectively) according to a GLM test (Poisson distribution).

**Figure S3. Data of four additional infection experiments with *P. syringae*.** Five-week-old Arabidopsis plants were pressure-infiltrated with *P. syringae* pv. *maculicola lux* (OD<sub>600</sub> = 0.001 in experiments 1 and 2 and OD<sub>600</sub> = 0.0005 in experiments 3 and 4) and luminescence (RLU cm<sup>-2</sup>; corresponding to bacterial titre) was determined at 3 dpi. The mutants *pmr4-1*, *sid2-1* and *npr1-1*, included as additional controls in experiment 4, were previously reported to exhibit enhanced resistance<sup>1</sup> and susceptibility to *P. syringae*<sup>2,3</sup>, respectively. **A** The boxplot shows data from four experiments (Exp. 1-Exp. 4) based on n = 7 to 13 plants per genotype, with each plant value represented by the median of three leaves. Centre lines mark the medians, upper and lower box limits indicate the 25<sup>th</sup> and 75<sup>th</sup> percentiles, respectively; upper and lower whiskers extend 1.5 times the interquartile range from the 25<sup>th</sup> and 75<sup>th</sup> percentiles, respectively; and dots represent outliers. Letters indicate statistically different groups (at least  $P < 0.05$ ) according to a GLM test (quasi-Poisson distribution). **B** Representative macroscopic infection phenotypes from experiment 4 at 3 dpi. Yellow arrows indicate the inoculated leaves.

## References

1. Flors, V. *et al.* Interplay between JA, SA and ABA signalling during basal and induced resistance against *Pseudomonas syringae* and *Alternaria brassicicola*. *Plant J.* **54**, 81–92 (2008).
2. Cao, H. Bowling, S. A. Gordon, A. S. & Dong, X. N. Characterization of an Arabidopsis mutant that is nonresponsive to inducers of systemic acquired resistance. *Plant Cell* **6**, 1583–1592 (1994).
3. Nawrath, C. & Metraux, J. P. Salicylic acid induction-deficient mutants of Arabidopsis express *PR-2* and *PR-5* and accumulate high levels of camalexin after pathogen inoculation. *Plant Cell* **11**, 1393–1404 (1999).

# Supplemental Figure 1

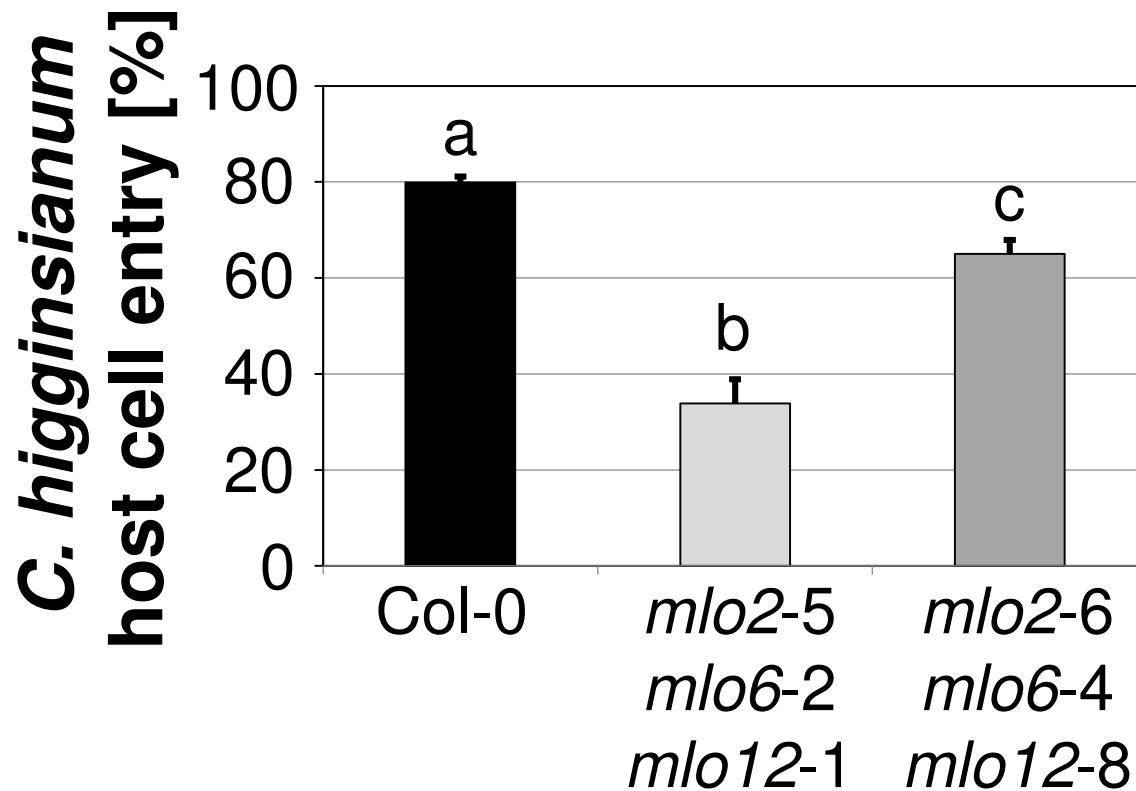



# Supplemental Figure 2

## B

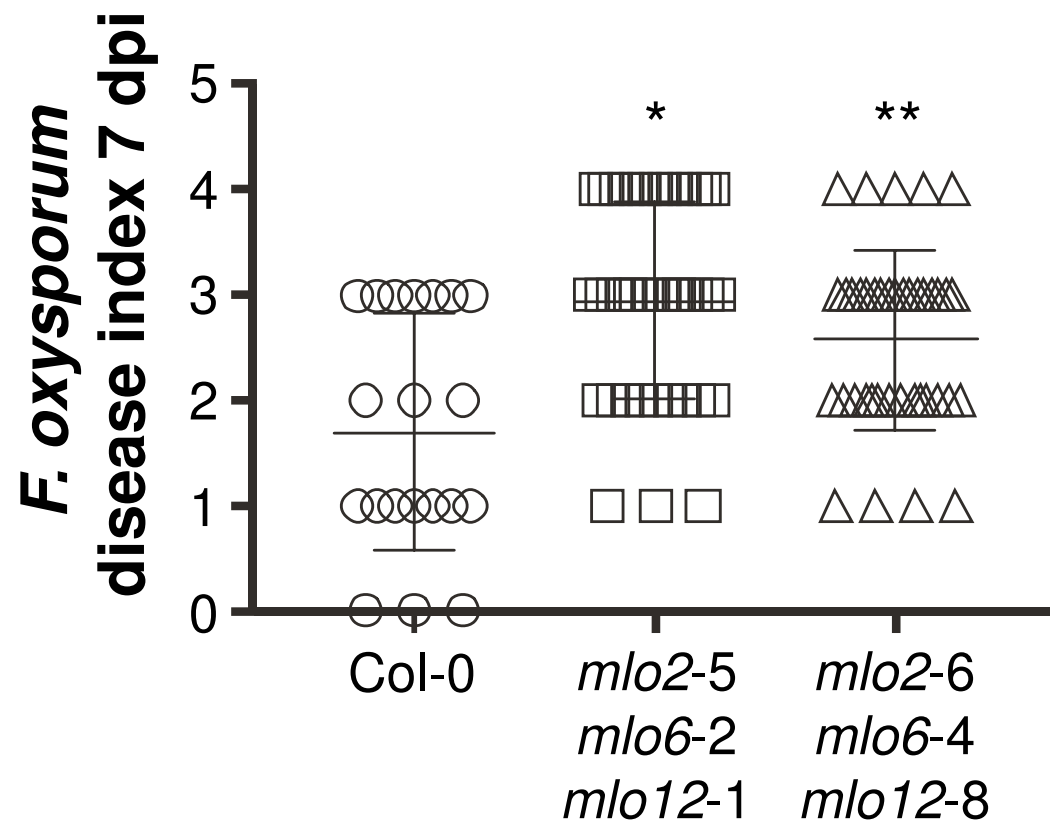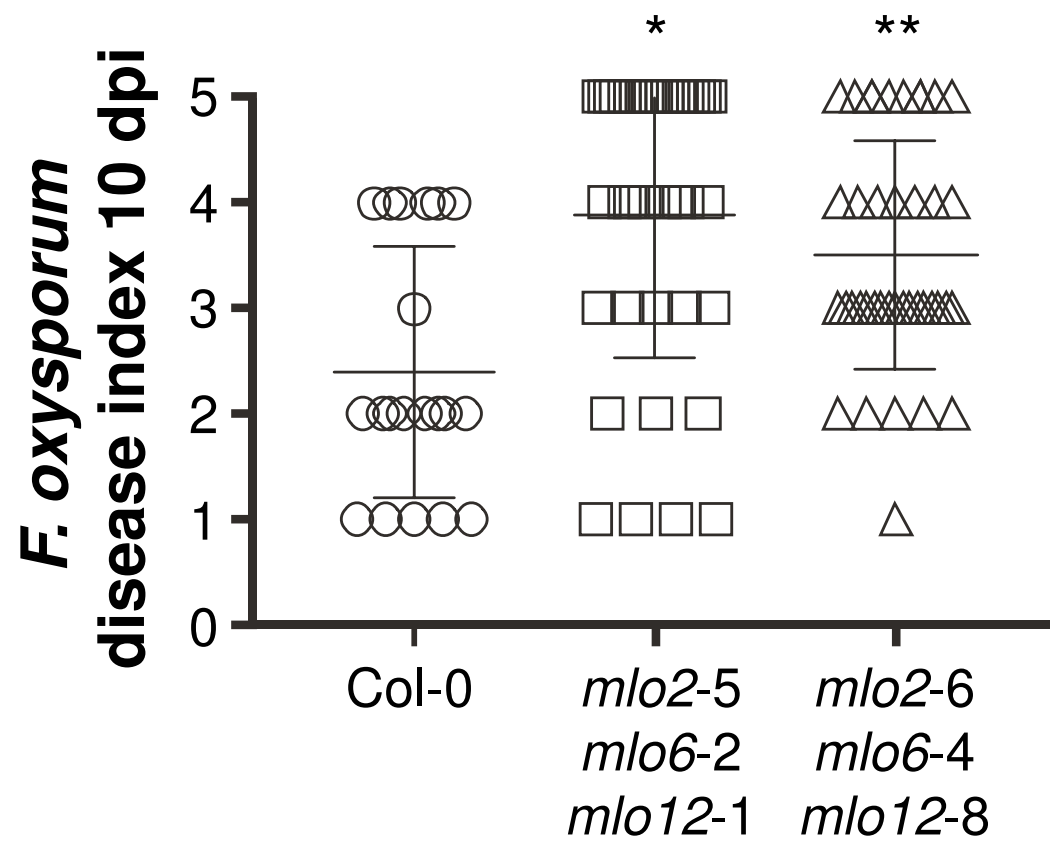

# Supplemental Figure 3

## A

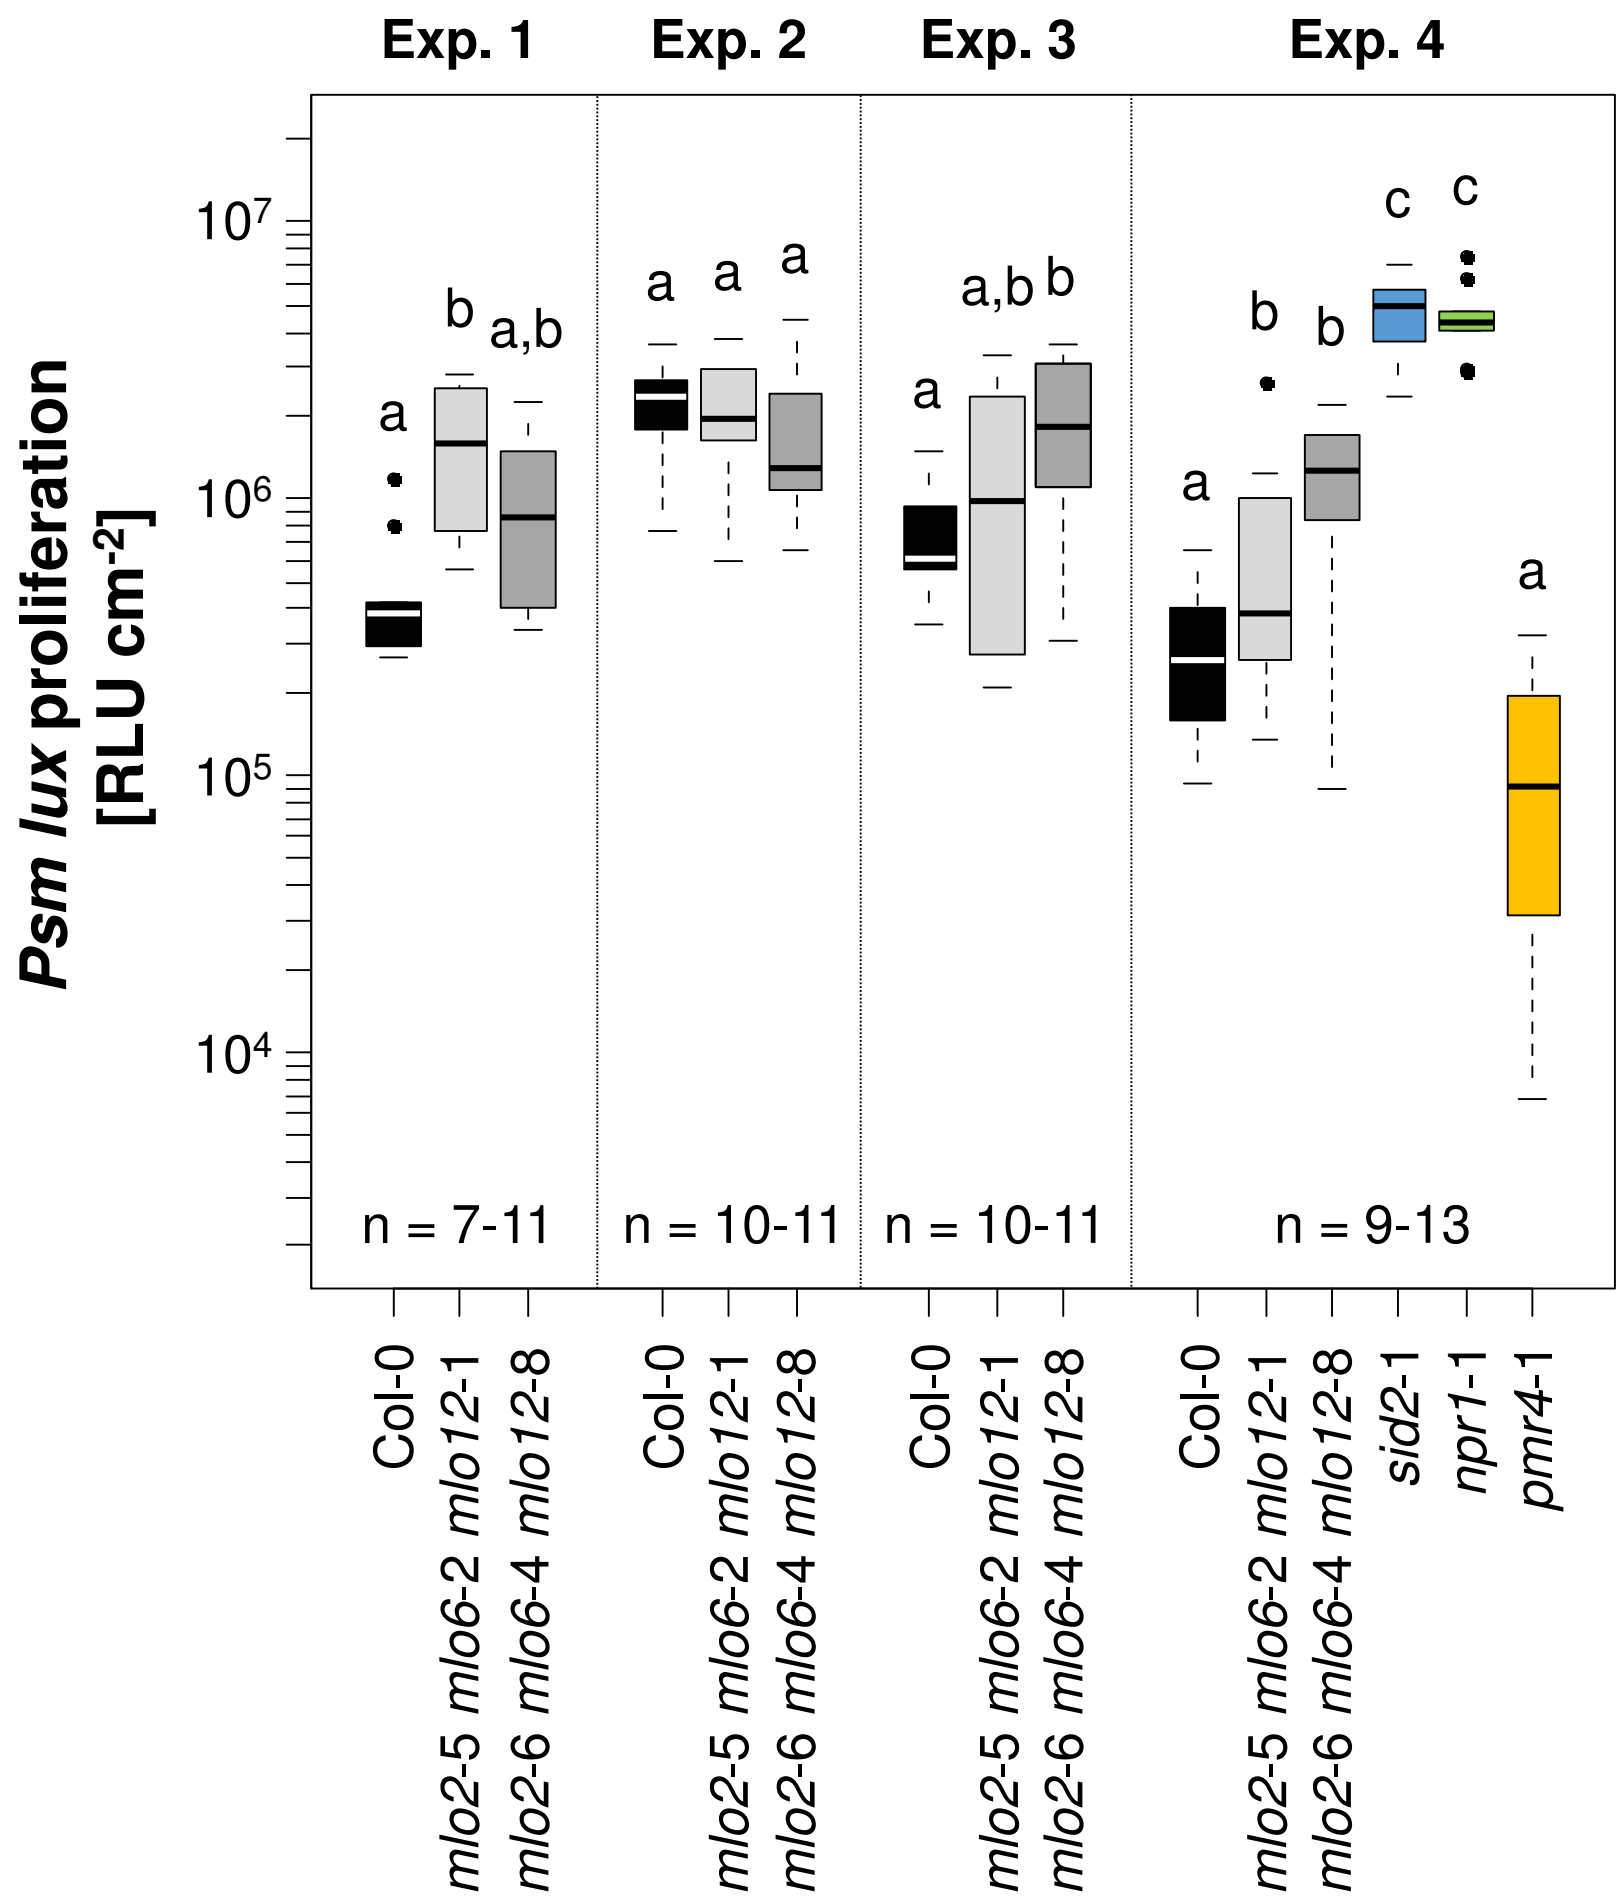

## B

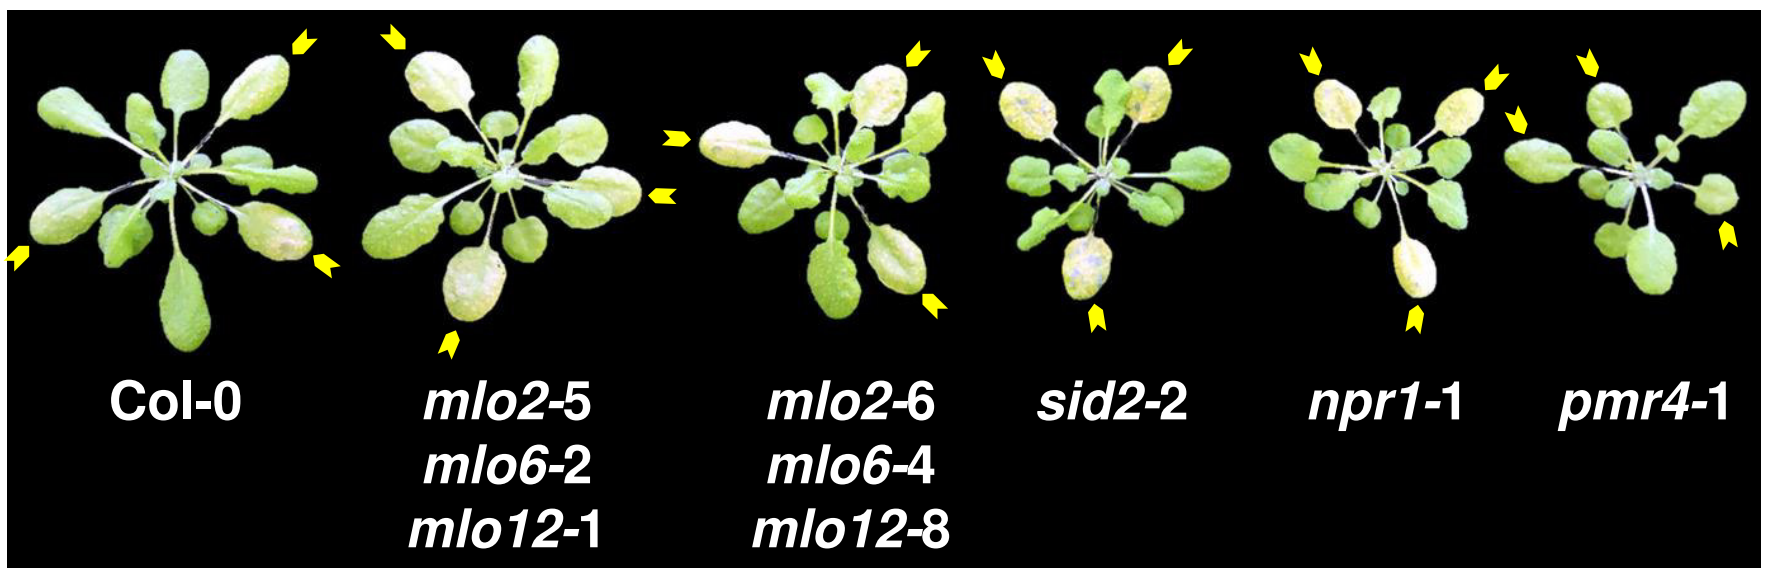

Supplement: 41598_2017_7188_MOESM1_ESM.pdf [file 41598_2017_7188_MOESM1_ESM.pdf]
